# Supplementary material
Source: publisher figshare collection journal article supplement (https://karger.figshare.com/articles/dataset/_/9771743)
Supplement: Supplementary file 1 [file 1]

Archive with 6 entries (6 files):
- 502633_sm1.pdf
- 502633_sm2.jpg
- 502633_sm4.pdf
- 502633_sm5.pdf
- 502633_sm6.jpg
- 502633_sm3.pdf
