# Supplementary material
Source: publisher figshare collection journal article supplement (https://karger.figshare.com/articles/dataset/_/9771743)
Supplement: Supplementary file 1 [file 1 › 502633_sm1.pdf]

## Supplementary Figure Legends

1    Supplementary Fig. 1. Selection process for study population

2    Abbreviation: J-DOPPS, Japanese Dialysis Outcomes and Practice Pattern Study.

3

Supplementary Fig. 2. Hazard ratios for major adverse cardiovascular events (MACEs) in sensitivity analysis

*Note:* Multivariable-adjusted restricted cubic spline plots of hazard ratio (HR) for MACEs according to post-Hb/pre-Hb ratio in sensitivity analysis. The solid line represents HR, and the dotted line represents 95% confidence interval. The horizontal gray line corresponds to the normal reference HR of 1.0. Post-Hb/pre-Hb ratio = 1.1 was used as reference in this study.

4    The multivariable-adjusted model was adjusted for age, sex, cause of end-stage renal disease,

5    history of heart disease, hemodialysis vintage, interdialytic weight loss, treatment time,

6    ultrafiltration rate, serum albumin, serum phosphorus, pre-dialysis hemoglobin concentration, pre-

7    dialysis systolic blood pressure, changes in systolic blood pressure before and after dialysis, and

8    post-dialysis body weight in sensitivity analysis 1&3.

9    The multivariable-adjusted model was adjusted for age, sex, cause of end-stage renal disease,

10    history of heart disease, hemodialysis vintage, interdialytic weight loss, treatment time,

11    ultrafiltration rate, serum albumin, serum phosphorus, pre-dialysis hemoglobin concentration, pre-

12    dialysis systolic blood pressure, changes in systolic blood pressure before and after dialysis, post-

13    dialysis body weight, and C-reactive protein in sensitivity analysis 2.

Abbreviations: Hb, hemoglobin.

14    \*MACEs included acute myocardial infarction, stroke, and all-cause mortality.

15
