# Supplementary material
Source: publisher figshare collection journal article supplement (https://karger.figshare.com/articles/dataset/_/9771743)
Supplement: Supplementary file 1 [file 1 › 502633_sm3.pdf]

# 1 Supplementary Table 1. Characteristics of patients for each dataset

|                                                           | Participants<br>in DOPPS4-5<br>(N=4806) | Participants<br>in primary analysis<br>(n=865) | Participants<br>in sensitivity analysis 1&2<br>(n=966) | Participants<br>in sensitivity analysis 3<br>(n=831) |
|-----------------------------------------------------------|-----------------------------------------|------------------------------------------------|--------------------------------------------------------|------------------------------------------------------|
| Age, years                                                | 65.2 (12.4)<br>(missing, n=28)          | 65.6 (12.5)                                    | 65.7 (12.5)<br>(missing, n=1)                          | 65.7 (12.5)                                          |
| Male                                                      | 65.1<br>(missing, n=32)                 | 61.4                                           | 61.7<br>(missing, n=1)                                 | 61.4                                                 |
| Cause of ESRD : diabetes                                  | 37.3<br>(missing, n=287)                | 36.3                                           | 37.3<br>(missing, n=44)                                | 36.5                                                 |
| History of heart disease                                  | 46.0<br>(missing, n=0)                  | 45.9                                           | 47.5<br>(missing, n=0)                                 | 46.3                                                 |
| Haemodialysis vintage, years                              | 3.5 [0.5-9.4]<br>(missing, n=50)        | 3.6 [0.6-8.3]                                  | 3.5 [0.6-8.3]<br>(missing, n=2)                        | 3.6 [0.6-8.3]                                        |
| IDWL > 5.7% of post-dialytic body weight                  | 7.7<br>(missing, n=346)                 | 9.6                                            | 9.9<br>(missing, n=32)                                 | 9.0                                                  |
| Treatment time, minutes                                   | 232.9 (30.1)<br>(missing, n=337)        | 230.7 (29.3)                                   | 231.7 (29.5)<br>(missing, n=32)                        | 231.0 (28.9)                                         |
| Ultrafiltration rate >10 mL/kg/hr                         | 38.7<br>(missing, n=420)                | 43.1                                           | 43.3<br>(missing, n=41)                                | 42.6                                                 |
| Serum albumin, g/dl                                       | 3.7 (0.5)<br>(missing, n=301)           | 3.7 (0.5)                                      | 3.7 (0.4)<br>(missing, n=7)                            | 3.7 (0.4)                                            |
| Serum phosphorus, mg/dL                                   | 5.3 (1.4)<br>(missing, n=184)           | 5.3 (1.3)                                      | 5.3(1.3)<br>(missing, n=3)                             | 5.3 (1.3)                                            |
| CRP, mg/dl                                                | 0.12 [0.06-0.40]<br>(missing, n=1758)   | 0.12 [0.05-0.41]<br>(missing, n=374)           | 0.12 [0.05-0.42]<br>(missing, n=411)                   | 0.11 [0.05-0.41]<br>(missing, n=369)                 |
| Pre-dialysis Hb, g/dl                                     | 10.5 (1.3)<br>(missing, n=437)          | 10.4 (1.2)                                     | 10.4 (1.2)<br>(missing, n=0)                           | 10.4 (1.2)                                           |
| Pre-dialysis systolic BP, mmHg                            | 145.8 (24.0)<br>(missing, n=364)        | 147.4 (23.9)                                   | 147.0 (23.7)<br>(missing, n=46)                        | 147.6 (23.8)                                         |
| changes in systolic BP<br>before and after dialysis, mmHg | 6.8 (24.3)<br>(missing, n=369)          | 7.8 (23.9)                                     | 7.6 (23.7)<br>(missing, n=47)                          | 7.8 (23.6)                                           |
| Post-dialysis body weight, kg                             | 55.4 (11.7)<br>(missing, n=344)         | 54.9 (12.0)                                    | 55.0 (11.8)<br>(missing, n=31)                         | 55.0 (12.0)                                          |
| MACEs                                                     | 14.5                                    | 16.8                                           | 17.1                                                   | 16.4                                                 |

2

3 *Note:* Values for categorical variables are presented as percentage; values for continuous variables  
4 are expressed as mean (standard deviation) or median [interquartile range].

5 Abbreviations: J-DOPPS, Japanese Dialysis Outcomes and Practice Pattern Study; ESRD, end-stage  
6 renal disease; IDWL, interdialytic weight loss; CRP, C-reactive protein; Hb, hemoglobin; BP, blood  
7 pressure; MACEs, major adverse cardiovascular events.

8 \*MACEs included acute myocardial infarction, stroke, and all-cause mortality.

9
