# Supplementary material
Source: publisher figshare collection journal article supplement (https://karger.figshare.com/articles/dataset/_/9771743)
Supplement: Supplementary file 1 [file 1 › 502633_sm4.pdf]

1     Supplementary Table 2. Number of mortality and major adverse cardiovascular events (MACEs)  
2     by post-Hb/pre-Hb categories

|                                   | Total      | < 1.0     | ≥ 1.0 to < 1.1 | ≥ 1.1 to < 1.2 | ≥ 1.2     |
|-----------------------------------|------------|-----------|----------------|----------------|-----------|
| Number of patients                | 865        | 115       | 348            | 314            | 88        |
| Number of MACEs                   | 145 (16.8) | 22 (19.1) | 58 (16.7)      | 49 (15.6)      | 16 (18.2) |
| Death                             | 107 (73.8) | 17 (77.3) | 43 (74.1)      | 37 (75.5)      | 10 (62.5) |
| AMI                               | 5 (3.4)    | 0 (0.0)   | 2 (3.4)        | 2 (4.1)        | 1 (6.3)   |
| Stroke                            | 33 (22.8)  | 5 (22.7)  | 13 (22.4)      | 10 (20.4)      | 5 (31.3)  |
| Ischemic                          | 17         | 3         | 9              | 4              | 1         |
| Hemorrhagic                       | 8          | 2         | 2              | 3              | 1         |
| Unknown                           | 8          | 0         | 2              | 3              | 3         |
| Number of deaths                  | 116 (13.4) | 18 (15.7) | 45 (12.9)      | 42 (13.4)      | 11 (12.5) |
| CV events                         | 33 (28.4)  | 8 (44.4)  | 9 (20.0)       | 13 (31.0)      | 3 (27.3)  |
| Other vascular events             | 2 (1.7)    | 0 (0.0)   | 0 (0.0)        | 1 (2.4)        | 1 (9.1)   |
| Stroke                            | 10 (8.6)   | 1 (5.6)   | 6 (13.3)       | 3 (7.1)        | 0 (0.0)   |
| Ischemic                          | 1          | 0         | 1              | 0              | 0         |
| Hemorrhagic                       | 9          | 1         | 5              | 3              | 0         |
| Infectious diseases               | 16 (13.8)  | 2 (11.1)  | 7 (15.6)       | 7 (16.7)       | 0 (0.0)   |
| Gastrointestinal diseases         | 1 (0.9)    | 1 (5.6)   | 0 (0.0)        | 0 (0.0)        | 0 (0.0)   |
| Liver diseases                    | 4 (3.4)    | 1 (5.6)   | 2 (4.4)        | 1 (2.4)        | 0 (0.0)   |
| Cancers                           | 11 (9.5)   | 0 (0.0)   | 6 (13.3)       | 3 (7.1)        | 2 (18.2)  |
| Others                            | 16 (13.8)  | 2 (11.1)  | 5 (11.1)       | 6 (14.3)       | 3 (27.3)  |
| Unknown                           | 23 (19.8)  | 3 (16.7)  | 10 (22.2)      | 8 (19.0)       | 2 (18.2)  |
| Number of vascular access failure | 106 (12.3) | 13 (11.3) | 40 (11.5)      | 42 (13.4)      | 11 (12.5) |

4     Abbreviations: Hb, hemoglobin; CV, cardiovascular; AMI, acute myocardial infarction.

5     \*MACEs included AMI, stroke, and all-cause mortality.

6
