# Supplementary material
Source: publisher figshare collection journal article supplement (https://karger.figshare.com/articles/dataset/_/9771743)
Supplement: Supplementary file 1 [file 1 › 502633_sm5.pdf]

Supplementary Table 3. Hazard ratios for major adverse cardiovascular events (MACEs) by post-Hb/pre-Hb categories in sensitivity analysis

|                                 | < 1.0                      | ≥ 1.0 to < 1.1             | ≥ 1.1 to < 1.2 | ≥ 1.2                      |
|---------------------------------|----------------------------|----------------------------|----------------|----------------------------|
| MACEs in sensitivity analysis 1 |                            |                            |                |                            |
| Unadjusted HR                   | <b>1.73 (1.43 to 2.09)</b> | <b>1.29 (1.08 to 1.55)</b> | reference      | 1.19 (0.98 to 1.45)        |
| Adjusted HR                     | <b>1.69 (1.41 to 2.02)</b> | <b>1.28 (1.08 to 1.52)</b> | reference      | <b>1.35 (1.07 to 1.71)</b> |
| MACEs in sensitivity analysis 2 |                            |                            |                |                            |
| Unadjusted HR                   | <b>1.73 (1.43 to 2.09)</b> | <b>1.29 (1.08 to 1.55)</b> | reference      | 1.19 (0.98 to 1.45)        |
| Adjusted HR                     | <b>1.69 (1.40 to 2.03)</b> | <b>1.27 (1.08 to 1.51)</b> | reference      | <b>1.33 (1.05 to 1.68)</b> |
| MACEs in sensitivity analysis 3 |                            |                            |                |                            |
| Unadjusted HR                   | <b>1.84 (1.44 to 2.35)</b> | <b>1.31 (1.11 to 1.54)</b> | reference      | <b>1.30 (1.06 to 1.59)</b> |
| Adjusted HR                     | <b>1.77 (1.33 to 2.36)</b> | <b>1.27 (1.11 to 1.46)</b> | reference      | <b>1.38 (1.11 to 1.72)</b> |

*Note:* Bold values indicate statistically significant values.

The multivariable-adjusted model was adjusted for age, sex, cause of end-stage renal disease, history of heart disease, hemodialysis vintage, interdialytic weight loss, treatment time, ultrafiltration rate, serum albumin, serum phosphorus, pre-dialysis hemoglobin concentration, pre-dialysis systolic blood pressure, changes in systolic blood pressure before and after dialysis, and post-dialysis body weight in sensitivity analysis 1&3.

The multivariable-adjusted model was adjusted for age, sex, cause of end-stage renal disease, history of heart disease, hemodialysis vintage, interdialytic weight loss, treatment time, ultrafiltration rate, serum albumin, serum phosphorus, pre-dialysis hemoglobin concentration, pre-dialysis systolic blood pressure, changes in systolic blood pressure before and after dialysis, post-dialysis body weight, and C-reactive protein in sensitivity analysis 2.

Abbreviations: Hb, hemoglobin; HR, hazard ratio.

\*MACEs included acute myocardial infarction, stroke, and all-cause mortality.
