# Supplementary material
Source: publisher figshare collection journal article supplement (https://karger.figshare.com/articles/dataset/_/9771743)

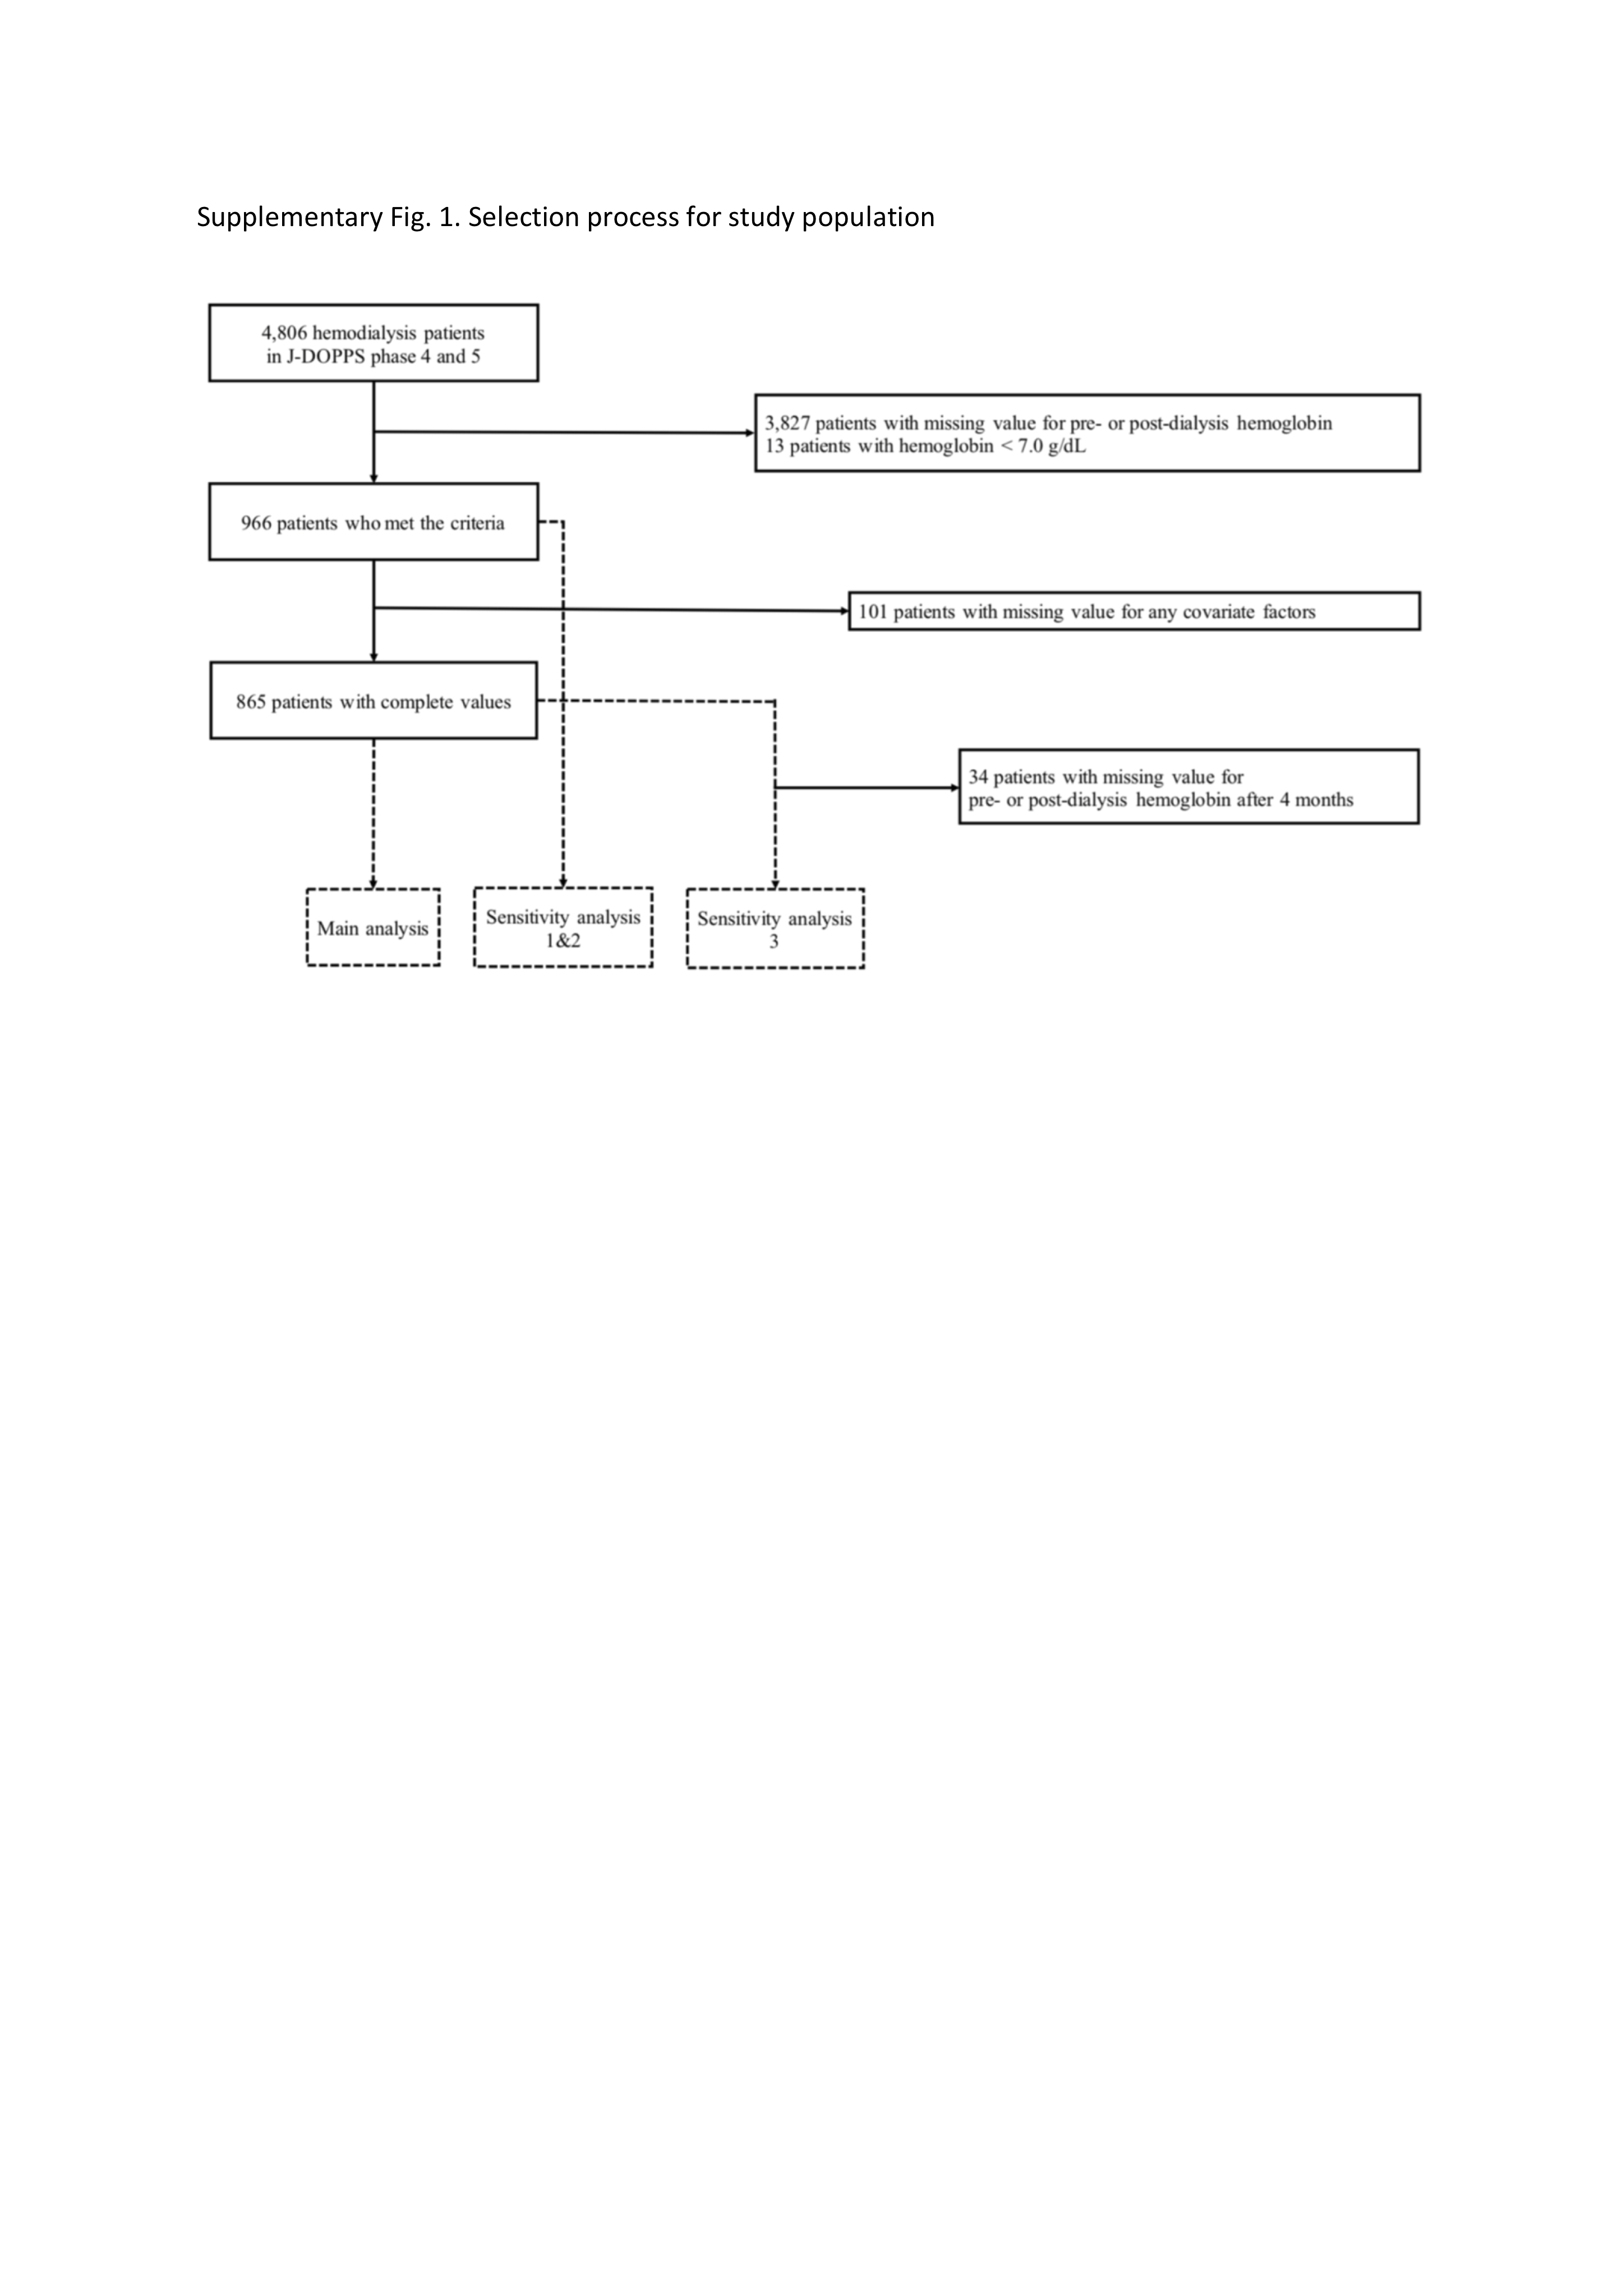

Supplement: Supplementary file 1 [file 1 › 502633_sm2.jpg]

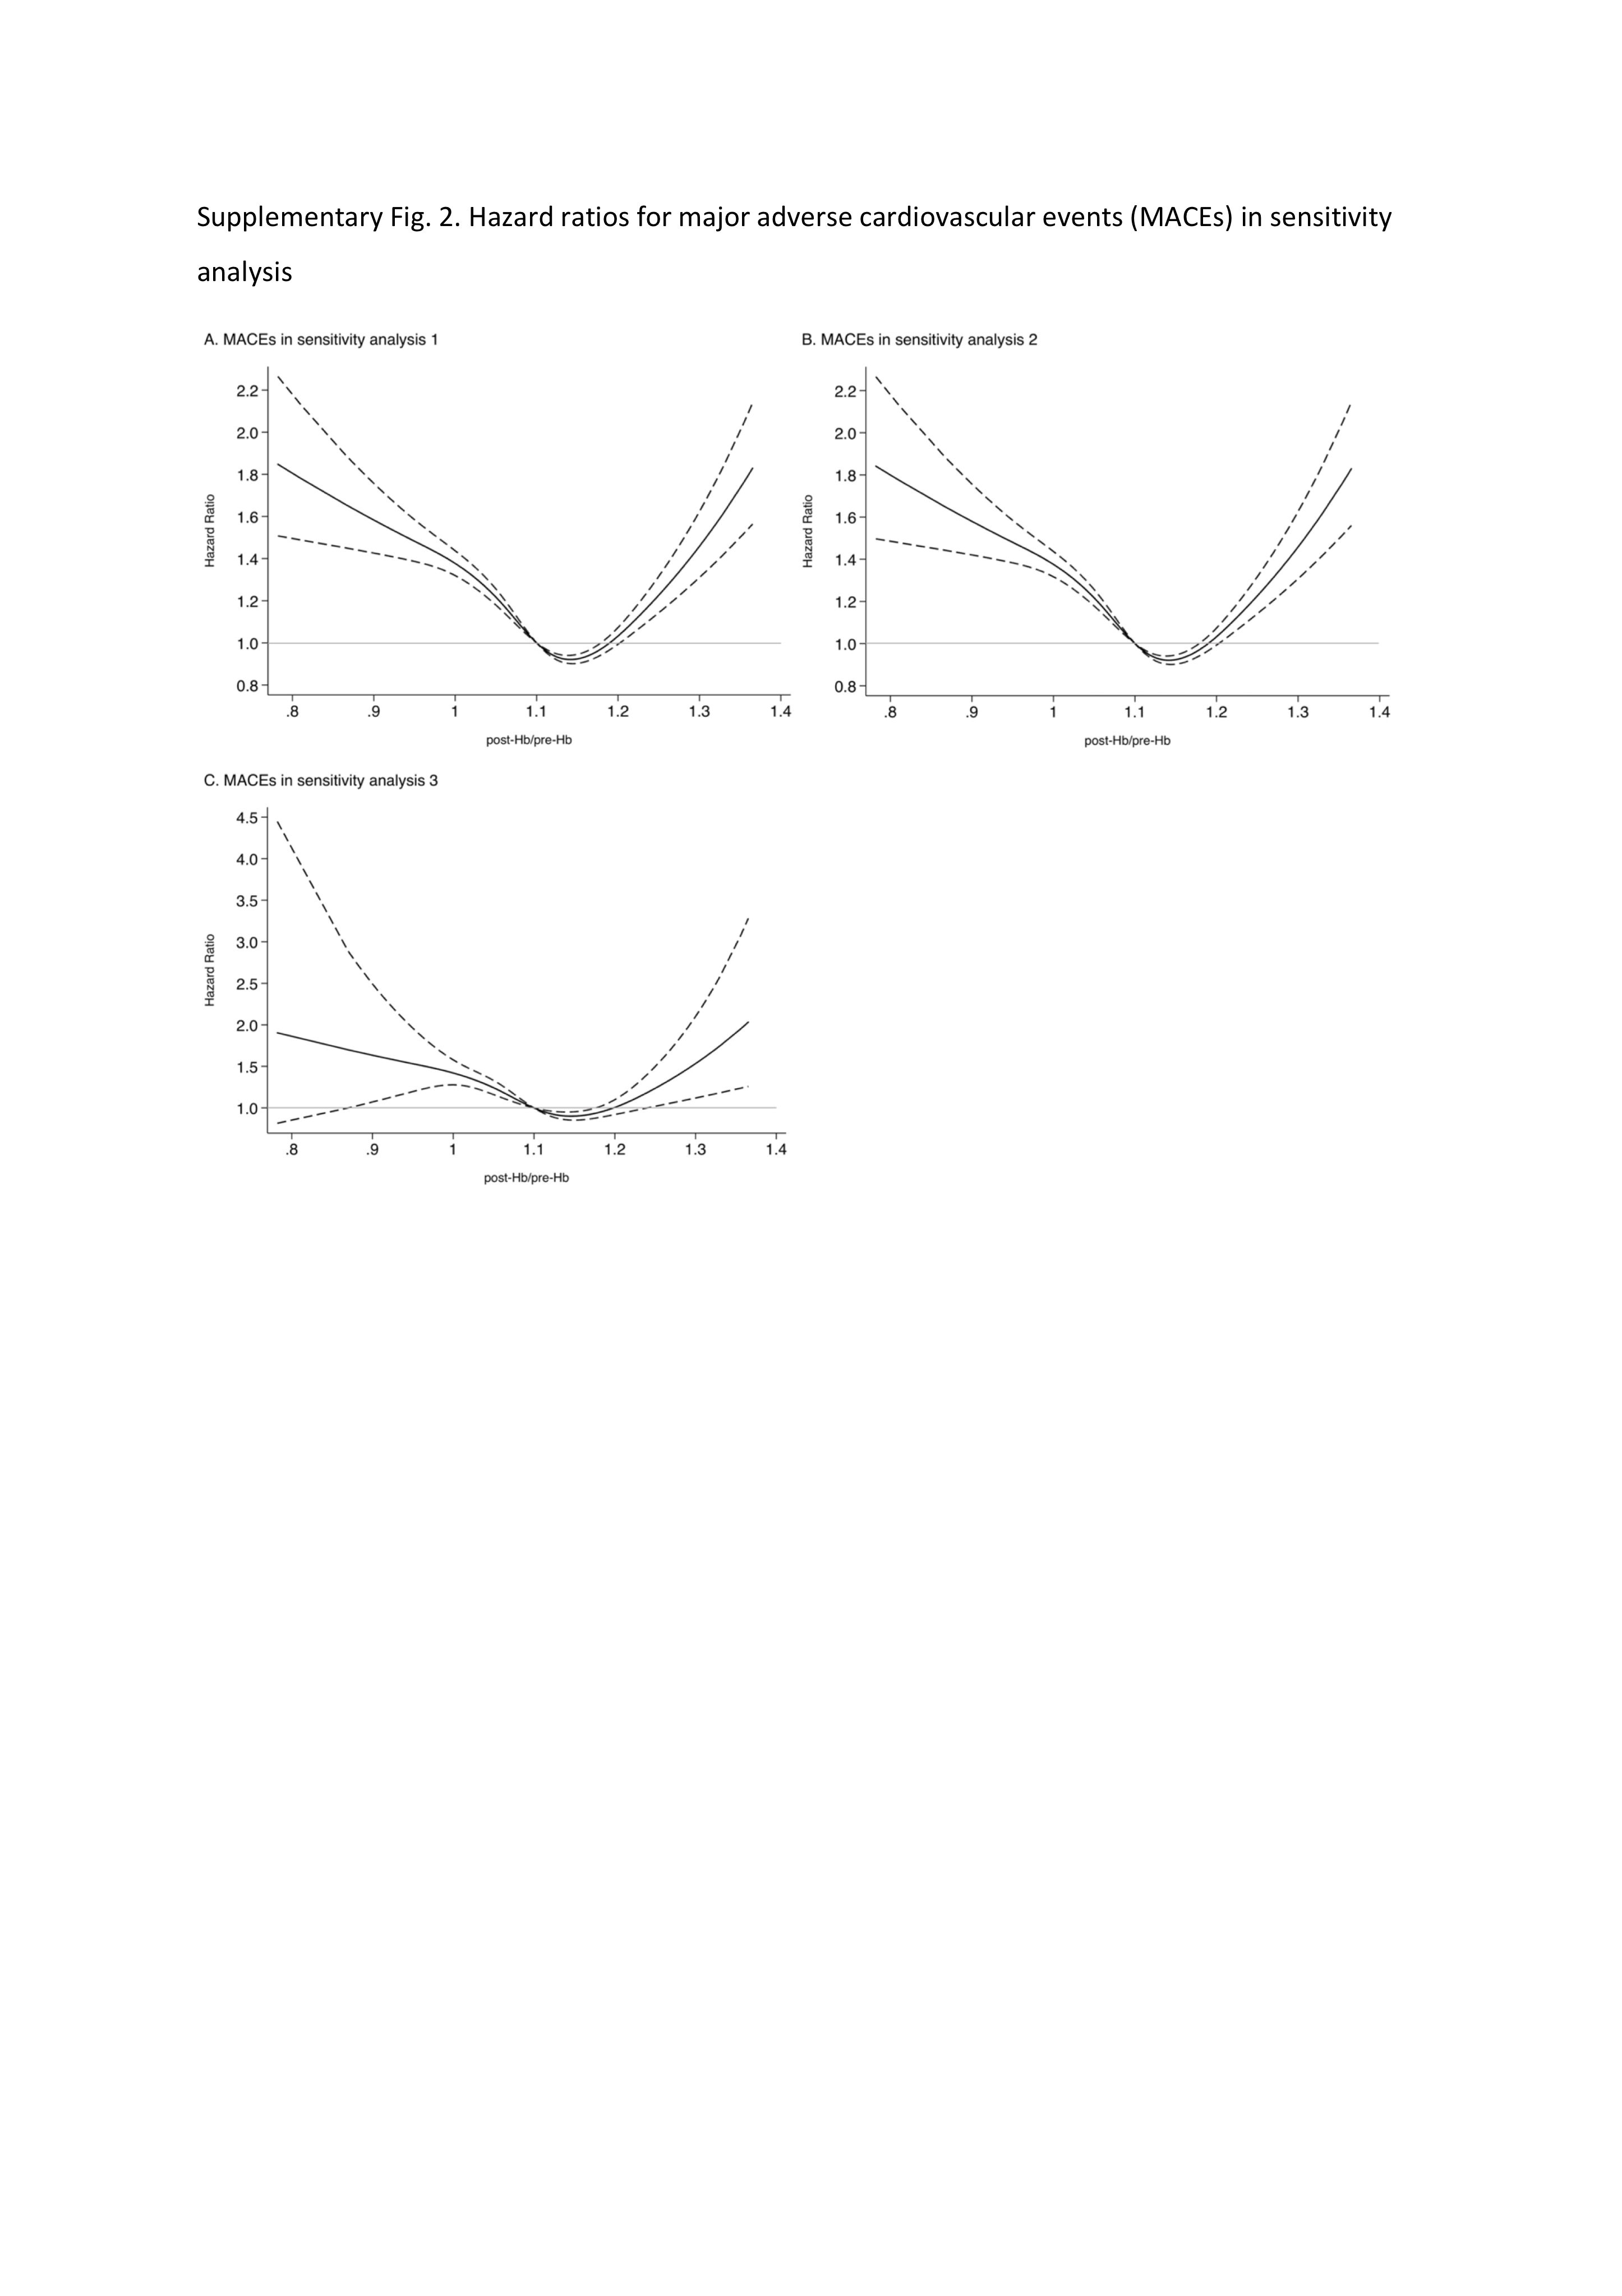

Supplement: Supplementary file 1 [file 1 › 502633_sm6.jpg]
